# Supplementary material for: A Biopsychosocial Model for the Management of Patients With Sickle-Cell Disease Transitioning to Adult Medical Care
Source: Springer Nature journal article supplement (doi:10.1007/s12325-015-0197-1), 2015-04-01
Supplement: MOESM1 [file 9203474]

- Patients with sickle cell disease (SCD) face unique challenges related to the biology of the disease as well as psychosocial factors, sociological factors, and differences in health care delivery when transitioning from pediatric to adult care.
- Primary health care providers who treat patients with SCD need to understand how to manage acute and chronic pain and comorbidities, monitor neurocognitive function, manage ongoing transfusions and iron chelation therapy, and discuss treatment adherence during the transition process.
- Young adults with SCD have the highest rates of acute-care utilization and rehospitalization compared with the general SCD population, which may indicate poor continuity of care.
- A well-planned, biopsychosocial, multidisciplinary, and individualized program should be available to facilitate successful transition of all children with SCD to adult care.

This summary slide represents the opinions of the authors. Medical writing in the preparation of this manuscript was provided by Susan M. Kaup, PhD, and Tara Beers Gibson, PhD, of Evidence Scientific Solutions; editorial assistance was provided by Phase Five Communications. Support for this assistance was funded by Novartis Pharmaceuticals Corporation. The article processing charges associated with this publication were funded by Novartis Pharmaceuticals Corporation. For a full list of acknowledgments and conflicts of interest for all authors of this article, please see the full text online. Copyright © The Author(s) 2015. Creative Commons Attribution Noncommercial License (CC BY-NC).
